# Supplementary material for: Dynamics of single polyelectrolyte chains in salt-free dilute solutions investigated by analytical ultracentrifugation
Source: Royal Society of Chemistry journal article supplement (doi:10.1039/c5cp02111a), 2015-01-01
Supplement: c5cp02111a1.pdf [file c5cp02111a1.pdf]

Electronic Supplementary Information

## Dynamics of Single Polyelectrolyte Chain in Salt-free Dilute Solutions Investigated by Analytical Ultracentrifugation

Zhonglin Cao,<sup>a</sup> Sha Wu,<sup>a</sup> Guangzhao Zhang<sup>\*ab</sup>

<sup>a</sup> Hefei National Laboratory for Physical Sciences at Microscale, Department of Chemical Physics, University of Science and Technology of China, Hefei, China 230026

<sup>b</sup> Faculty of Materials Science and Engineering, South China University of Technology, Guangzhou, China, 510640

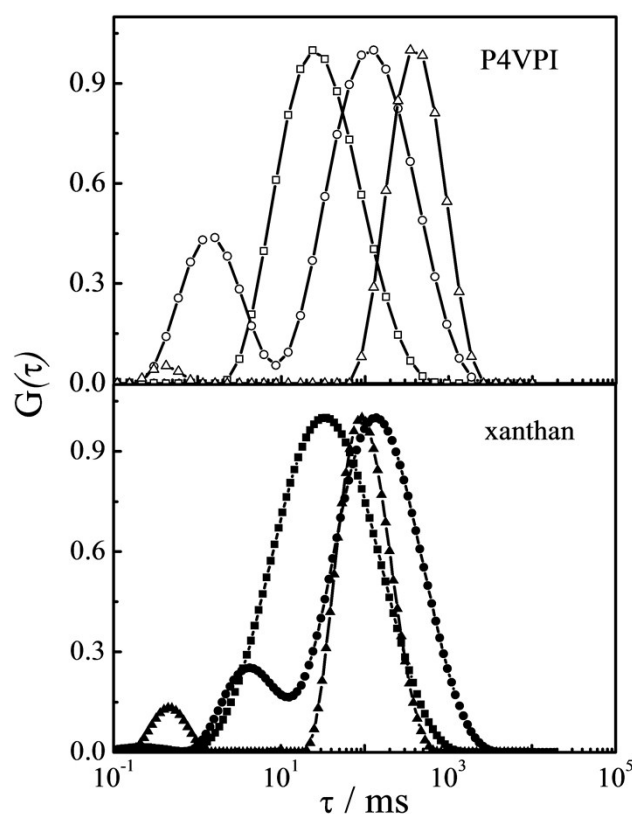

**Fig. S1.** Characteristic relaxation time distributions ( $G(\tau)$ ) of xanthan and P4VPI in salt-free aqueous solutions obtained by dynamic laser light scattering (DLS) at  $\theta=15^\circ$ . The polyelectrolyte concentrations ( $C_p$ ) are 0.02 mg/mL (square), 0.10 mg/mL (circle) and 1.00 mg/mL (triangle), respectively.

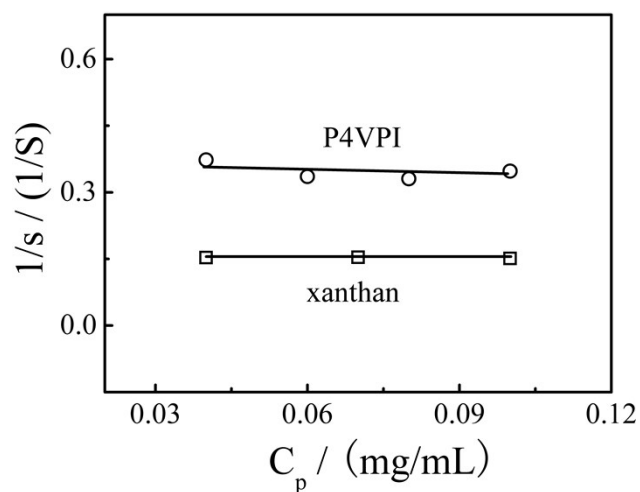

**Fig. S2.** Concentration ( $C_p$ ) dependence of the reciprocal apparent sedimentation coefficients ( $1/s$ ) of xanthan or P4VPI in 0.01 M NaCl solutions. The solid lines are fit by using eq. 5.

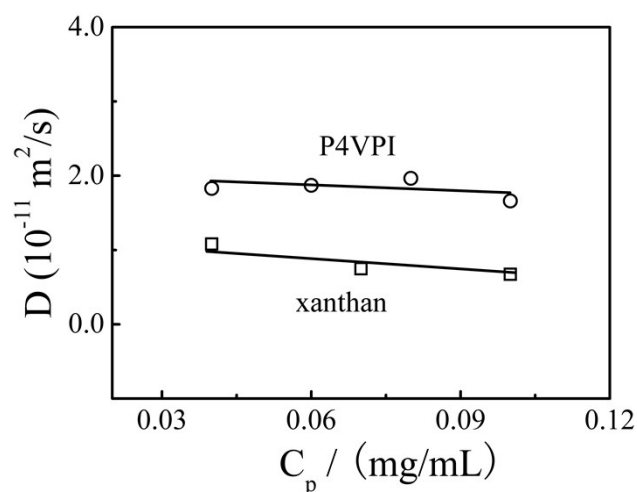

**Fig. S3.** Concentration ( $C_p$ ) dependence of the apparent diffusion coefficient ( $D$ ) of xanthan or P4VPI in 0.01 M NaCl solutions below 0.1 mg/ml. The solid lines are fit by using eq. 6.

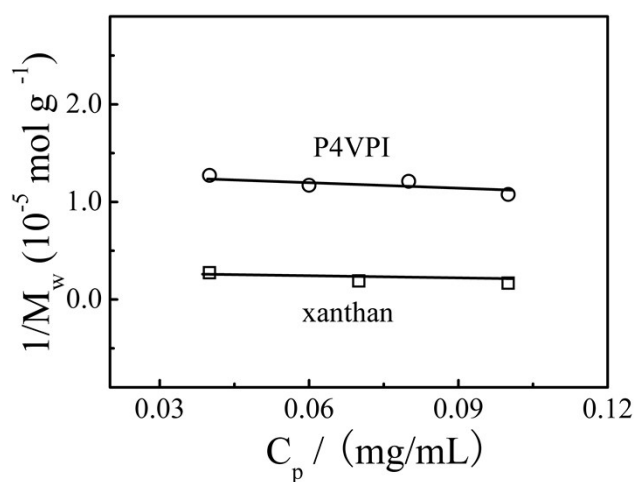

**Fig. S4.** Concentration ( $C_p$ ) dependence of the apparent reciprocal molecular weight ( $1/M_w$ ) of xanthan or P4VPI in 0.01 M NaCl solutions. The solid lines are fit by using eq. 12.
